# Supplementary material for: A renal YY1-KIM1-DR5 axis regulates the progression of acute kidney injury
Source: PubMed Central journal article supplement (PMC10352345; doi:10.1038/s41467-023-40036-z), 2023-07-17
Supplement: 41467_2023_40036_MOESM1_ESM.pdf [file 41467_2023_40036_MOESM1_ESM.pdf]

## Supplementary Materials

*For*

### **A renal YY1-KIM1-DR5 axis regulates the progression of acute kidney injury**

Chen Yang<sup>1#</sup>, Huidie Xu<sup>1#</sup>, Dong Yang<sup>1,2</sup>, Yunhao Xie<sup>2</sup>, Mingrui Xiong<sup>1</sup>, Yu Fan<sup>2</sup>, XiKai Liu<sup>2</sup>, Yu Zhang<sup>1</sup>, Yushuo Xiao<sup>1</sup>, Yuchen Chen<sup>1</sup>, Yihao Zhou<sup>2</sup>, Liangliang Song<sup>1</sup>, Chen Wang<sup>1</sup>, Anlin Peng<sup>3</sup>, Robert B. Petersen<sup>4</sup>, Hong Chen<sup>1\*</sup>, Kun Huang<sup>1,5\*</sup>, Ling Zheng<sup>2\*</sup>

<sup>1</sup>School of Pharmacy, Tongji Medical College and State Key Laboratory for Diagnosis and Treatment of Severe Zoonotic Infectious Diseases, Huazhong University of Science and Technology, Wuhan, 430030, China

<sup>2</sup>Hubei Key Laboratory of Cell Homeostasis, Frontier Science Center for Immunology and Metabolism, College of Life Sciences, Wuhan University, Wuhan, 430072, China

<sup>3</sup>Department of Pharmacy, The Third Hospital of Wuhan, Tongren Hospital of Wuhan University, Wuhan, 430070, China

<sup>4</sup>Foundational Sciences, Central Michigan University College of Medicine, Mt. Pleasant, MI, 48859, USA

<sup>5</sup>Tongji-RongCheng Biomedical Center, Tongji Medical College, Huazhong University of Science and Technology, Wuhan, 430030, China

# These authors contribute equally

*Corresponding authors*

Ling Zheng, Ph.D., College of Life Sciences, Wuhan University, Wuhan, China, 430072,  
[lzheng@whu.edu.cn](mailto:lzheng@whu.edu.cn).

Kun Huang, Ph.D., Tongji School of Pharmacy, Huazhong University of Science &  
Technology, Wuhan, China, 430030, [kunhuang@hust.edu.cn](mailto:kunhuang@hust.edu.cn).

Hong Chen, Ph.D., Tongji School of Pharmacy, Huazhong University of Science &  
Technology, Wuhan, China, 430030, [hongchen2017@hust.edu.cn](mailto:hongchen2017@hust.edu.cn).

## **Supplementary Table of Contents**

**Supplementary Table 1.** ChIP-seq data for KIM1 obtained from GTRD.

**Supplementary Table 2.** Top 20 KIM1-binding partners.

**Supplementary Table 3.** Protein-protein interaction (PPI) modeling of human KIM1 and DR5 truncations.

**Supplementary Table 4.** Potential antagonist peptides that block human KIM1-DR5 interaction designed by Alphafold2 PPI modeling.

**Supplementary Table 5.** *In silico* calculation of effects of three antagonist peptides on mouse KIM1-DR5 interaction.

**Supplementary Table 6.** Primers for ChIP assays used in this study.

**Supplementary Table 7.** Primers for qPCR used in this study

**Supplementary Fig. 1.** KIM1 is upregulated in renal I/R-induced AKI models.

**Supplementary Fig. 2.** Expression pattern of YY1 in cisplatin-injured and uIRI-induced mice models and its correlation with KIM1.

**Supplementary Fig. 3.** Identification of DR5 as a potential binding partner of KIM1.

**Supplementary Fig. 4.** Nystatin inhibits the formation of high-ordered DR5 oligomers and protects against cisplatin injury in cultured tubular cells.

**Supplementary Fig. 5.** Validation of *Kim1*<sup>K<sup>sp</sup></sup> KO.

**Supplementary Fig. 6.** Renal tubular specific knockout of *Kim1* attenuates inflammation in mouse AKI models.

**Supplementary Fig. 7.** Screening of peptides blocking KIM1-DR5 interaction by Alphafold2 and their effects against cisplatin injury in cultured renal tubular cells.

**Supplementary Fig. 8.** *Ex vivo* distribution of Cy7-labeled peptide P2 in cisplatin-injured AKI mice models and co-staining of P2, KIM1, DR5 in HK-2 cells.

**Supplementary Table 1. ChIP-seq data for KIM1 obtained from GTRD.**

| <b>Binding Site</b> | <b>From</b> | <b>To</b> | <b>Length</b> | <b>Sample type</b>   | <b>Score</b> |
|---------------------|-------------|-----------|---------------|----------------------|--------------|
| A                   | 157069032   | 157069520 | 489           | lymphoblastoid cells | 6.27541      |
| B                   | 157069668   | 157070025 | 358           | HEK293T              | 12           |
| C                   | 157069783   | 157070140 | 358           | lymphoblastoid cells | 6.27541      |
| D                   | 157069983   | 157070356 | 374           | lymphoblastoid cells | 4.53518      |

Binding site A indicates that YY1 binds with *KIMI* promoter in the P3 region. Binding sites B-D indicate that YY1 binds with *KIMI* promoter in the P4 region.

**Supplementary Table 2. Top 20 KIM1-binding partners**

| Potential KIM1 binding partners                           | Sum PEP Score | Score Sequest HT | Peptides Sequest HT | Coverage    |
|-----------------------------------------------------------|---------------|------------------|---------------------|-------------|
| Transketolase                                             | 469.0391571   | 322.48           | 37                  | 79.93579454 |
| T-complex protein 1 subunit gamma                         | 432.7576569   | 263.158          | 47                  | 80.73394495 |
| Tumor necrosis factor receptor superfamily member 10B     | 418.3652      | 293.018          | 44                  | 72.58704    |
| Stress-70 protein, mitochondrial                          | 415.7114509   | 299.768          | 44                  | 65.39027982 |
| Heterogeneous nuclear ribonucleoprotein M                 | 399.5781672   | 292.527          | 50                  | 72.87671233 |
| Pyruvate kinase PKM                                       | 397.0157855   | 291.608          | 41                  | 78.34274953 |
| Stress-induced-phosphoprotein 1                           | 389.859977    | 230.577          | 57                  | 75.32228361 |
| X-ray repair crs-complementing protein 6                  | 384.8400658   | 225.776          | 48                  | 70.93596059 |
| T-complex protein 1 subunit epsilon                       | 384.7864825   | 242.817          | 37                  | 73.56746765 |
| Arginine--tRNA ligase                                     | 378.976953    | 203.943          | 46                  | 67.12121212 |
| Bifunctional purine biosynthesis protein PURH             | 371.9582963   | 203.286          | 37                  | 75.50675676 |
| Succinate dehydrogenase [ubiquinone] flavoprotein subunit | 368.2399038   | 184.958          | 33                  | 77.71084337 |
| T-complex protein 1 subunit alpha                         | 357.4008148   | 210.71           | 35                  | 81.29496403 |
| T-complex protein 1 subunit zeta                          | 350.0370489   | 263.084          | 33                  | 72.12806026 |
| Plastin-3                                                 | 344.3909043   | 233.132          | 42                  | 80.79365079 |
| Lamin-B1                                                  | 334.6964893   | 193.145          | 47                  | 68.94197952 |
| T-complex protein 1 subunit eta                           | 321.4935413   | 218.57           | 37                  | 75.69060773 |
| Trifunctional enzyme subunit alpha                        | 315.4693919   | 158.729          | 38                  | 66.97247706 |
| Cystathionine beta-synthase-like protein                  | 306.6156272   | 172.951          | 26                  | 68.60254083 |
| Tyrosine--tRNA ligase, cytoplasmic OS                     | 305.2868296   | 178.5064492      | 45                  | 74.24242424 |

**Supplementary Table 3. Protein-protein interaction (PPI) modeling of human KIM1 and DR5 truncations**

| <b>PPI</b>     | <b>Interface area (Å<sup>2</sup>)</b> | <b>Δ<sup>i</sup>G (kcal/mol)</b> |
|----------------|---------------------------------------|----------------------------------|
| KIM1-DR5       | 653.8                                 | -5.2                             |
| KIM1-DR5 ΔECD  | 99                                    | -1.2                             |
| KIM1-DR5 ΔTMH  | 591.3                                 | -3.5                             |
| KIM1-DR5 ΔCytD | 425.0                                 | -3.2                             |

Interface area, accessible surface area; Δ<sup>i</sup>G Solvation energy effect, kcal/mol.

**Supplementary Table 4. Potential antagonist peptides that block human KIM1-DR5 interaction designed by Alphafold2 PPI modeling.**

|             | Source  | Sequence                  | Length<br>(AA) | Interface area<br>(Å <sup>2</sup> ) | Δ <sup>i</sup> G<br>(kcal/mol) | ΔΔ <sup>i</sup> G<br>(kcal/mol) |
|-------------|---------|---------------------------|----------------|-------------------------------------|--------------------------------|---------------------------------|
|             | 34-47   | LPCHYSGAVTSMCW            | 14             | 789.8                               | -10.4                          | -5.2                            |
|             | 60-75   | GIVWTNGTHVTYRKDT          | 16             | 583.5                               | 0.4                            | 5.6                             |
| <b>KIM1</b> | 103-121 | YCCRVEHRGWFNDMKITVS       | 19             | 446.2                               | -4.6                           | 0.6                             |
|             | 302-323 | ISVLVLLALLGVIIAKKYFFKK    | 22             | 667.7                               | -5.9                           | -0.7                            |
|             | 68-85   | APQQRSSPSEGLCPPGH         | 18             | 99.3                                | -0.7                           | 4.5                             |
|             | 102-114 | DYSTHWNDLLFCL             | 13             | 838.8                               | -9.7                           | -4.5                            |
| <b>DR5</b>  | 126-140 | LSPCTTTRNTVCQCE           | 15             | 569.2                               | 1.5                            | 6.7                             |
|             | 217-241 | GVTVAAVVLIVAVFVCKSLLWKKVL | 25             | 674.4                               | -8.2                           | -3                              |
|             | 344-355 | DFADLVPFDSWE              | 12             | 516.3                               | -2.8                           | 2.4                             |
|             | 373-382 | AEAAGHRDTL                | 10             | 549.1                               | -5.2                           | 0                               |

Interface area, accessible surface area; Δ<sup>i</sup>G Solvation energy effect, kcal/mol; ΔΔ<sup>i</sup>G =PostΔ<sup>i</sup>G of (KIM1-DR5) -PreΔ<sup>i</sup>G of (KIM1-DR5).

The Δ<sup>i</sup>G of human (KIM1-DR5) is -5.2 kcal/mol.



**Supplementary Table 5. *In silico* calculation of effects of three antagonist peptides on mouse KIM1-DR5 interaction.**

| <b>Blocking Peptides</b> | <b>Source</b> | <b>Sequence</b>   | <b>Length (AA)</b> | <b>Interface area (Å<sup>2</sup>)</b> | <b>Δ<sup>i</sup>G (kcal/mol)</b> | <b>ΔΔ<sup>i</sup>G (kcal/mol)</b> |
|--------------------------|---------------|-------------------|--------------------|---------------------------------------|----------------------------------|-----------------------------------|
| <b>P1</b>                | KIM1 60-75    | GIVWTNGTHVTYRKDT  | 16                 | 129.1                                 | -2.7                             | 3.8                               |
| <b>P2</b>                | DR5 68-85     | APQQRSSPSEGLCPPGH | 18                 | 153.0                                 | 0.1                              | 6.6                               |
| <b>P3</b>                | DR5 126-140   | LSPCTTTRNTVCQCE   | 15                 | 107.8                                 | -1.4                             | 5.1                               |

Interface area, accessible surface area; Δ<sup>i</sup>G Solvation energy effect, kcal/mol; ΔΔ<sup>i</sup>G = PostΔ<sup>i</sup>G of (KIM1-DR5) - PreΔ<sup>i</sup>G of (KIM1-DR5). The Δ<sup>i</sup>G of mouse (KIM1-DR5) is -6.5 kcal/mol.

**Supplementary Table 6. Primers for ChIP assays used in this study.**

| Gene                     |    | Sequences |                         |
|--------------------------|----|-----------|-------------------------|
| <b>Human <i>KIM1</i></b> | P1 | Forward   | GCTGTCCAGAAGAGGGGAATC   |
|                          |    | Reverse   | CTCACTTTGTTTCCCCACGGA   |
|                          | P2 | Forward   | CACGTGTGTCATGGTGCTAAG   |
|                          |    | Reverse   | GACTTTTCCCTACTCCCGCC    |
|                          | P3 | Forward   | TGTTTTGGAAAGGCAAAGTGTCT |
|                          |    | Reverse   | ACCCAGCCTTAACTGTTTCATGT |
|                          | P4 | Forward   | GGGCAACAGGATGCTTGCTT    |
|                          |    | Reverse   | TGGCCACATTTGGGAAAAGTGA  |
| <b>Mouse <i>Kim1</i></b> | P1 | Forward   | GCCCTTTATGGCGAAGTCCA    |
|                          |    | Reverse   | AGAGGAAGCCAGCTGAACAC    |
|                          | P2 | Forward   | GAAGGCTCTGCCATTCAGC     |
|                          |    | Reverse   | GTTGAACGGCCCTTAAGCAG    |
|                          | P3 | Forward   | GATGGTCTCACCCACAAGGG    |
|                          |    | Reverse   | TGCCTCCATGAGATCCAAGT    |
|                          | P4 | Forward   | CTCCTCTTCGAAACCTCTCCC   |
|                          |    | Reverse   | AATAGAACCCAGTCAGGCTCG   |

**Supplementary Table 7. Primers for qPCR used in this study.**

|              | <b>Gene</b>   | <b>Forward</b>          | <b>Reverse</b>           |
|--------------|---------------|-------------------------|--------------------------|
| <b>Human</b> | <i>KIM1</i>   | TGGCAGATTCTGTAGCTGGTT   | AGAGAACATGAGCCTCTATTCCA  |
|              | <i>IL6</i>    | ACTCACCTCTTCAGAACGAATTG | CCATCTTTGGAAGGTCAGGTTG   |
|              | <i>CXCL2</i>  | CAAGAACATCCAAAGTGTGA    | CCATTCTTGAGTGTGGCTAT     |
|              | <i>CXCL10</i> | GTGGCATTCAAGGAGTACCTC   | TGATGGCCTTCGATTCTGGATT   |
|              | <i>YY1</i>    | ACGGCTTCGAGGATCAGATTC   | TGACCAGCGTTTGTTC AATGT   |
|              | <i>FAS</i>    | TCTGGTTCTTACGTCTGTTGC   | CTGTGCAGTCCCTAGCTTTCC    |
|              | <i>BAX</i>    | CCCGAGAGGTCTTTTTCCGAG   | CCAGCCCATGATGGTTCTGAT    |
|              | <i>BCL2</i>   | GGTGGGGTCATGTGTGTGG     | CGGTCAGGTA CTAGTCATCC    |
|              | <i>CYR61</i>  | TAAGGTCTGCGCTAAACA ACTC | CAGATCCCTTT CAGAGCGGT    |
| <b>Mouse</b> | <i>Nhe3</i>   | CAAGGTCACCAGTATCGTCCC   | GCATGAAGTATCCAGCATCCAAC  |
|              | <i>Fabp4</i>  | AAGGTGAAGAGCATCATAACCCT | TCACGCCTTT CATAACACATTCC |
|              | <i>Il18</i>   | GTGAACCC CAGACCAGACTG   | CCTGGAACACGTTTCTGAAAGA   |
|              | <i>Kim1</i>   | ACATATCGTGGAATCACAACGAC | ACTGCTCTTCTGATAGGTGACA   |
|              | <i>Ngal</i>   | TGGCCCTGAGTGTCATGTG     | CTCTTGTAGCTCATAGATGGTGC  |
|              | <i>Yy1</i>    | GTGGTTGAAGAGCAGATCATTGG | TTGCTTAGGGTCTGAGAGGTC    |
|              | <i>Esr1</i>   | CCCGCCTTCTACAGGTCTAAT   | CTTTCTCGTTACTGCTGGACAG   |
|              | <i>Usf1</i>   | CTGAAACCGAAGAGGGAACAG   | GTTGGGGTCAGGAAAAGTGG     |
|              | <i>Esr2</i>   | CTGTGATGAACTACAGTGTTCCC | CACATTTGGGCTTGCAGTCTG    |

|                           |                            |                          |
|---------------------------|----------------------------|--------------------------|
| <i>Erg</i>                | CCAGCAGCTCATATTAAGGAGG     | CGTTCCGTAGGCACACTCA      |
| <i>Ctcf</i>               | CAGTGGACGATACCCAGATCA      | CCTTCAGGCAAAGGTAAGGTG    |
| <i>Cdx2</i>               | TACCCGGACTACGGTGGTTAC      | GTGATGGTGCGCGTGGTAT      |
| <i>Gata4</i>              | CACCCCAATCTCGATATGTTTGA    | GCACAGGTAGTGTCCCGTC      |
| <i>Cebpa</i>              | GCGGGAACGCAACAACATC        | GTCACTGGTCAACTCCAGCAC    |
| <i>Nr3c1</i>              | GACTCCAAAGAATCCTTAGCTCC    | CTCCACCCCTCAGGGTTTTAT    |
| <i>Foxa1</i>              | ACATTCAAGCGCAGCTACCC       | TGCTGGTTCTGGCGGTAATAG    |
| <i>Gata6</i>              | TTGCTCCGTAACAGCAGTG        | GTGGTCGCTTGTGTAGAAGGA    |
| <i>Foxa2</i>              | TCCGACTGGAGCAGCTACTAC      | GCGCCCACATAGGATGACA      |
| <i>Gata3</i>              | AAGCTCAGTATCCGCTGACG       | GTTTCCGTAGTAGGACGGGAC    |
| <i>Tcf7l2</i>             | TCATCACGTACAGCAATGAACA     | CGACAGCGGGTAATATGGAGAG   |
| <b>Mouse</b> <i>Tcf12</i> | ATGTACTGTGCTTATCCTGTCCC    | GGTGCATATAACCGTTTTCCATT  |
| <i>Fosl2</i>              | CACGCCGAGTCCTACTCCA        | GTGGGCTGTACCATCCACTG     |
| <i>Stat1</i>              | TCACAGTGGTTCGAGCTTCAG      | CGAGACATCATAGGCAGCGTG    |
| <i>Stat3</i>              | CACCTTGGATTGAGAGTCAAGAC    | AGGAATCGGCTATATTGCTGGT   |
| <i>Cebpb</i>              | GGTGCCCGCTGCAGTTT          | CTCGCAGTTTAGTGGTGGTAAGTC |
| <i>Max</i>                | CAAGCGGGCTACCATAATG        | TGTTGCTTTGTCTAGGATTTGGG  |
| <i>Spi1</i>               | TTACAGGCGTGCAAAATGGAA      | GACGTTGGTATAGCTCTGAATCG  |
| <i>Spl</i>                | AGGGTCCGAGTCAGTCAGG        | CTCGCTGCCATTGGTACTGTT    |
| <i>Il6</i>                | TCTGCAAGAGACTTCCATCCAGTTGC | AGCCTCCGACTTGTGAAGTGGT   |
| <i>Fas</i>                | GCGGGTTCGTGAAACTGATAA      | GCAAAATGGGCCTCCTTGATA    |
| <i>Bax</i>                | AGACAGGGGCCTTTTTGCTAC      | AATTCGCCGGAGACACTCG      |

|              |                    |                          |                          |
|--------------|--------------------|--------------------------|--------------------------|
| <b>Mouse</b> | <i>Bcl2</i>        | GCTACCGTCGTGACTTCGC      | CCCCACCGAACTCAAAGAAGG    |
|              | <i>Tnfa</i>        | GGTGATCGGTCCCCAAAGGGATGA | TGGTTTGCTACGACGTGGGCT    |
|              | <i>Il1b</i>        | AAAGCCTCGTGCTGTCGGACC    | CAGGGTGGGTGTGCCGTCTT     |
|              | <i>Mcp1</i>        | TAAAAACCTGGATCGGAACCAAA  | GCATTAGCTTCAGATTTACGGGT  |
|              | <i>Cxcl2</i>       | ACGGAAGAACCAAAGAGAA      | AAATAAGTGAACCTCAGACAGC   |
|              | <i>Cxcl10</i>      | ATCATCCCTGCGAGCCTATCCT   | GACCTTTTTTGGCTAAACGCTTTC |
|              | <i>Tgfb1</i>       | GACTCTCCACCTGCAAGACC     | GGACTGGCGAGCCTTAGTTT     |
|              | <i>Fibronectin</i> | ATGTGGACCCCTCCTGATAGT    | GCCCAGTGATTCAGCAAAGG     |
|              | <i>Colla1</i>      | GCTCCTCTTAGGGGCCACT      | ATTGGGGACCCTTAGGCCAT     |
|              | <i>Ksp-Cre</i>     | GCAGATCTGGCTCTCCAAAG     | AGGCAAATTTTGGTGTACGG     |
|              | <i>Flox/Flox</i>   | ACTTGGTCCCATGTGAGAACATG  | AAGATGCTAAGCCTTCGTTGACC  |

---

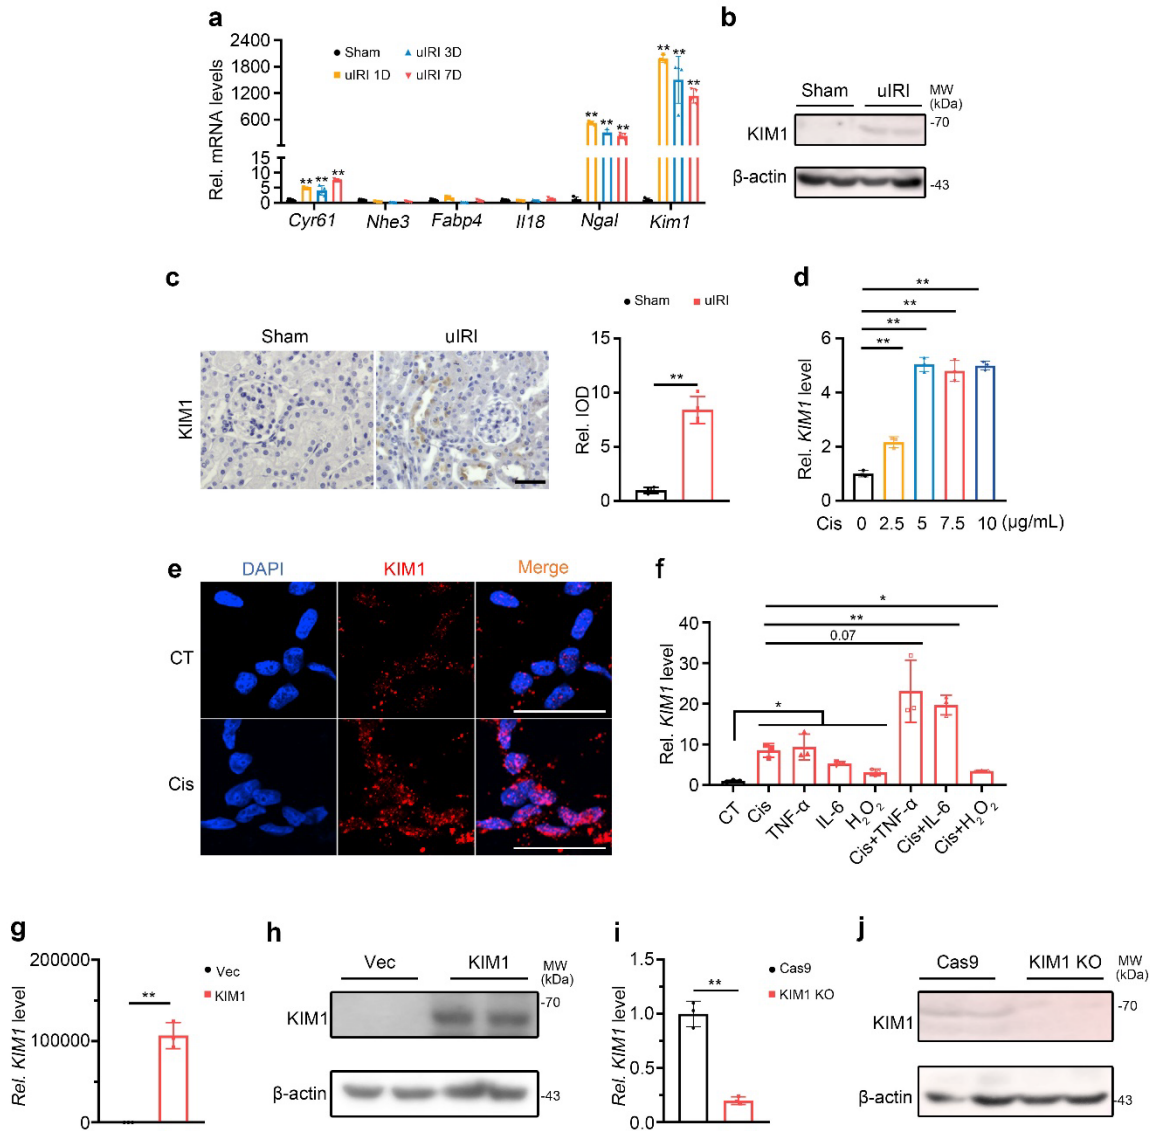

**Supplementary Fig 1. KIM1 is dramatically upregulated in unilateral renal ischemia-reperfusion injured mice.** **a** qPCR analysis of several known AKI biomarkers in mouse kidneys at indicated time after unilateral renal ischemia-reperfusion injury (uIRI). Sham, non-injury control; uIRI, unilateral ischemia reperfusion injury. n = 4 mice per group. **b** Western blot analysis of KIM1 protein level in mouse kidneys at Day 3 after uIRI. n = 2 mice per group, each experiment was repeated at least three times independently with

similar results obtained. **c** Representative images of KIM1 immunohistochemistry staining with quantitative analysis at Day 3 after uIRI. Scale bar, 50  $\mu\text{m}$ .  $n = 4$  mice per group. **d** qPCR analysis of *KIM1* level at indicated dosage in 24 hrs cisplatin-injured HK-2 cells.  $n = 3$  biological samples per group. **e** Representative immunofluorescence staining of KIM1 at 24 hrs of 5  $\mu\text{g}/\text{mL}$  cisplatin injured HK-2 cells. Scale bar, 50  $\mu\text{m}$ . Each experiment was repeated at least three times independently with similar results obtained. **f** qPCR analysis of *KIM1* level in HK-2 cells with indicated stimuli with or without 5  $\mu\text{g}/\text{mL}$  cisplatin. IL-6 (50 ng/mL), TNF- $\alpha$  (20 ng/mL), H<sub>2</sub>O<sub>2</sub> (800  $\mu\text{M}$ ).  $n = 3$  biological samples for per group. **g-j** Efficiency of KIM1 overexpression (g-h) or knockout (i-j) in HK-2 cells. (g & I)  $n = 3$  biological samples per group; (h & j) each experiment was repeated at least three times independently with similar results obtained. Vec, pRK-5'Flag; KIM1, pRK-5'Flag-KIM1; Cas9, lenti-CRISPR/Cas9; KIM1 KO, lenti-CRISPR/Cas9-based KIM1 knockout. Data were shown as mean  $\pm$  SD. Two-tailed unpaired Student's t test was used for two experimental groups, and one-way ANOVA for multiple experimental groups without adjustment. \* $P < 0.05$ ; \*\* $P < 0.01$ . Exact  $P$  values are provided in Source Data file.

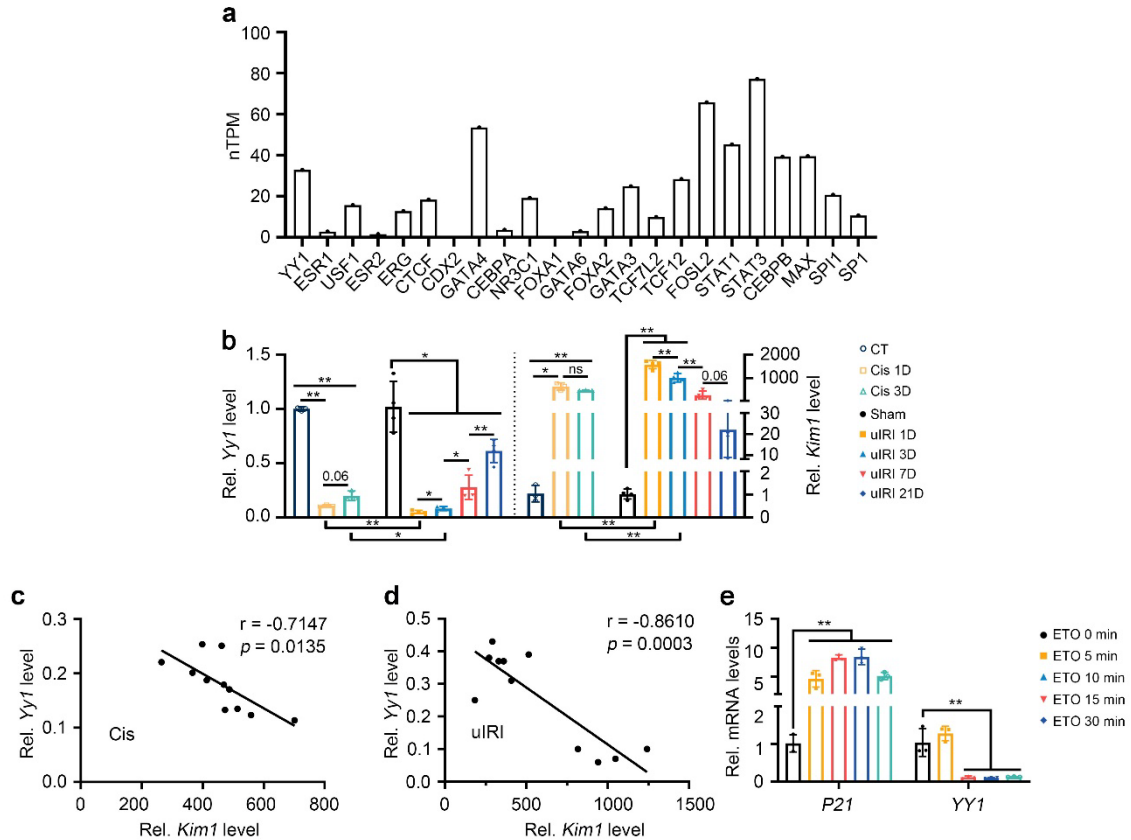

**Supplementary Fig 2. Expression pattern of YY1 in cisplatin-injured and uIRI mice models and its correlation with KIM1.** **a** Expression levels of 23 transcription factors in the kidney as indicated by the Human Protein ATLAS dataset (HPA). nTPM, number of protein-coding transcripts per million. **b** Expression pattern of *YY1* and *KIM1* in the kidneys of cisplatin (Cis)- or unilateral renal ischemia-reperfusion injury (uIRI)-injured mice for indicated time. Sham, non-injury control; uIRI, unilateral ischemia reperfusion injury.  $n = 4$  mice per group; two-tailed unpaired Student's *t* test was used. **c-d** Correlation analysis of *KIM1* and *YY1* mRNA levels at Day 3 after cisplatin injury (c) or uIRI (d).  $n = 11$  mice for CT and Cis 3D groups;  $n = 12$  mice for sham and uIRI 3D groups. **e** qPCR analysis of *p21* and *YY1* levels in HK-2 cells treated with 50  $\mu$ M etoposide (ETO) for



indicated time.  $n = 3$  biological samples per group. Data are shown as mean  $\pm$  SD. Two-tailed unpaired Student's  $t$  test was used for two experimental groups, and one-way ANOVA for multiple experimental groups without adjustment.  $*P < 0.05$ ;  $**P < 0.01$ ; ns, no significance. Exact  $P$  values are provided in Source Data file.

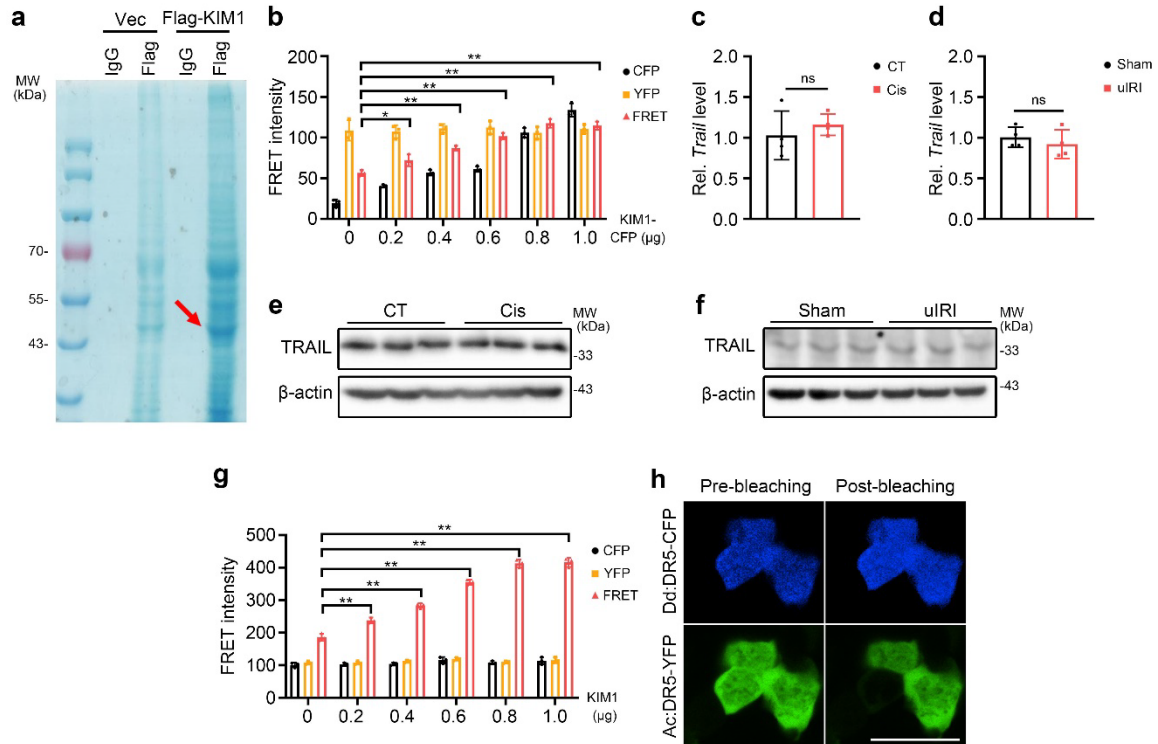

**Supplementary Fig 3. Identification of DR5 as a potential binding partner of KIM1.**

**a** SDS-PAGE of *KIM1*-overexpressed HEK293T cells, and Flag-pull down sample was used for mass spectrometry detection. Red arrow indicates DR5 containing band. Flag-KIM1, pRK-5'Flag-KIM1. Each experiment was repeated at least three times independently with similar results obtained. **b** Effects of gradient KIM1-CFP overexpression on the FRET intensity between KIM1-CFP and DR5-YFP in HK-2 cells. KIM1-CFP, pRK-5'Flag-KIM1-CFP. n = 3 biological samples per group. **c-f** qPCR (**c-d**) and Western blot analysis (**e-f**) of TRAIL at Day 3 after cisplatin injury (**c** & **e**) or unilateral renal ischemia-reperfusion injury (uIRI, **d** & **f**). (**c-d**) n = 4 mice per group; (**e-f**) n = 3 mice per group. **g** FRET analysis showed the effects of gradient KIM1 overexpression on DR5-CFP/DR5-YFP multimerization in HK-2 cells. n = 3 biological samples per group. **h**

Representative images of acceptor photobleaching analysis of DR5-CFP and DR5-YFP. Photobleaching of receptor (DR5-YFP) led to enhanced acceptor fluorescence (DR5-CFP).  $n = 3$  biological samples per group. Data are shown as mean  $\pm$  SD. Two-tailed unpaired Student's  $t$  test was used for two experimental groups, and one-way ANOVA for multiple experimental groups without adjustment. Scale bar, 25  $\mu\text{m}$ .  $*P < 0.05$ ;  $**P < 0.01$ ; ns, no significance. Exact  $P$  values are provided in Source Data file.

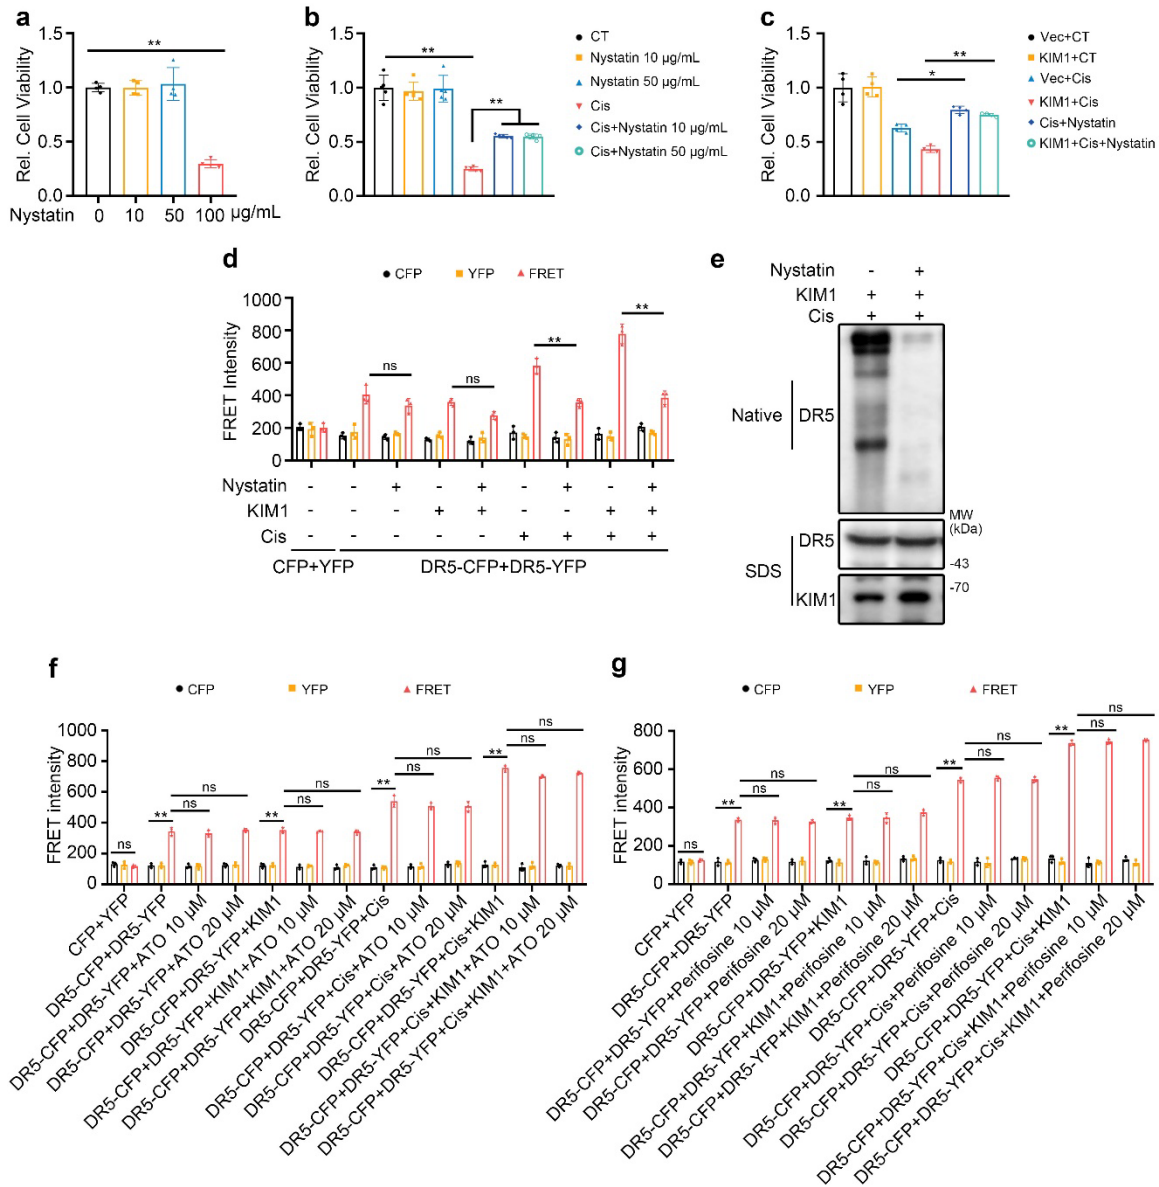

**Supplementary Fig 4. Nystatin inhibits the formation of higher-order DR5 oligomers and protects against cisplatin injury in cultured renal tubular cells.** **a** MTT assays showed the effect of indicated dosage of nystatin on HK-2 cells.  $n = 5$  biological samples per group, each experiment was repeated at least three times independently with similar results obtained. **b** MTT assays showed the effects of indicated dosage of nystatin on cisplatin injury induced cell death (Cis, 5 µg/mL, 24 hrs) in HK-2 cells.  $n = 5$  biological

samples per group, each experiment was repeated at least three times independently with similar results obtained. **c** MTT assays showed the effects of 10 µg/mL nystatin on cisplatin injury induced cell death with or without KIM1 overexpression in HK-2 cells.  $n = 4$  biological samples per group, each experiment was repeated at least three times independently with similar results obtained. **d** FRET analysis showed the effects of 10 µg/mL nystatin on DR5 multimerization in HK-2 cells with/without cisplatin injury. CFP, pRK-5'Flag-CFP; YFP, pRK-5'Flag-YFP; DR5-CFP, pRK-5'Flag-DR5-CFP; DR5-YFP, pRK-5'Flag-DR5-YFP;  $n = 3$  biological samples per group. **e** Native PAGE showed DR5 multimerization in the presence/absence of 10 µg/mL nystatin with KIM1 overexpression under cisplatin injury. Each experiment was repeated at least three times independently with similar results obtained. **f-g** FRET analysis showed the effects of atorvastatin (ATO) (f) and perifosine (g) on DR5 multimerization in HK-2 cells with or without cisplatin injury.  $n = 3$  biological samples per group, each experiment was repeated at least three times independently with similar results obtained. Data are shown as mean  $\pm$  SD. Two-tailed unpaired Student's *t* test was used for two experimental groups, and one-way ANOVA for multiple experimental groups without adjustment. \* $P < 0.05$ ; \*\* $P < 0.01$ ; ns, no significance. Exact *P* values are provided in Source Data file.

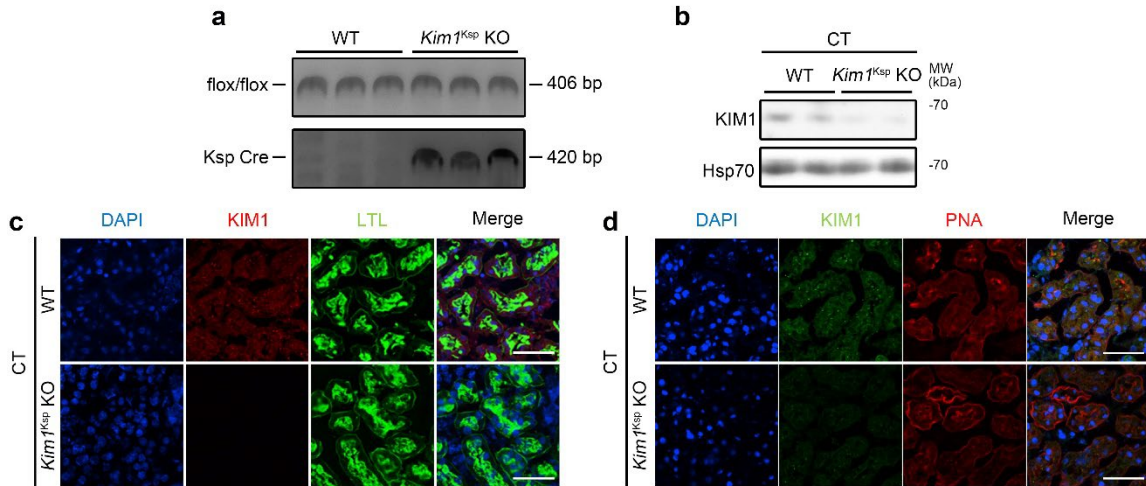

**Supplementary Fig 5. Validation of *Kim1<sup>Ksp</sup>* KO mouse.** **a** Genotyping results. n = 3 individual mice for WT and *Kim1<sup>Ksp</sup>* KO groups. **b** Western blot analysis of KIM1 protein levels in the kidneys of WT and *Kim1<sup>Ksp</sup>* KO mice under normal conditions (CT). n = 2 mice per group, each experiment was repeated at least three times independently with similar results obtained. **c** Representative images of Kim1 (red) with LTL (lotus tetragonolobus lectin, green) in the kidneys of WT and *Kim1<sup>Ksp</sup>* KO mice under normal conditions. Nuclei were stained with DAPI (blue). Scale bar, 50  $\mu$ m. n = 3 mice per group. **d** Representative images of Kim1 (green) with PNA (peanut agglutinin, red) of WT and *Kim1<sup>Ksp</sup>* KO mice under normal conditions. Nuclei were stained with DAPI (blue). n = 3 mice per group. Scale bar, 50  $\mu$ m.

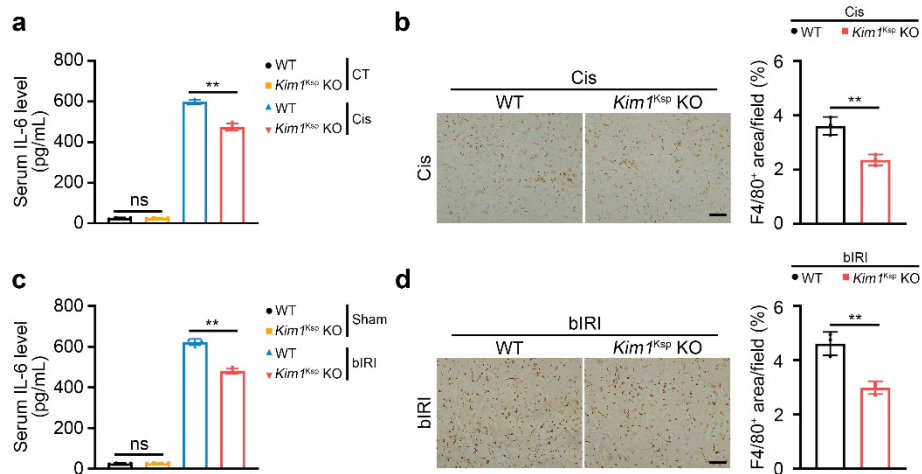

**Supplementary Fig 6. Renal tubular specific knockout of *Kim1* attenuates inflammation in mouse AKI models. a & c** Serum IL-6 levels in WT and *Kim1<sup>Ksp</sup>* KO mice at Day 3 after cisplatin injury (Cis, a) or at Day 1 after bilateral renal ischemia-reperfusion injury (bIRI, c). **b & d** IHC staining of F4/80 with quantitative results in WT and *Kim1<sup>Ksp</sup>* KO mice at Day 3 after cisplatin injury (b) or at Day 1 after bIRI (d). Scale bar, 50  $\mu$ m. (a-d) n = 3 mice per group. Data are shown as mean  $\pm$  SD. Two-tailed unpaired Student's t test was used for two experimental groups, and one-way ANOVA for multiple experimental groups without adjustment. \*\* $P < 0.01$ ; ns, no significance. Exact  $P$  values are provided in Source Data file.

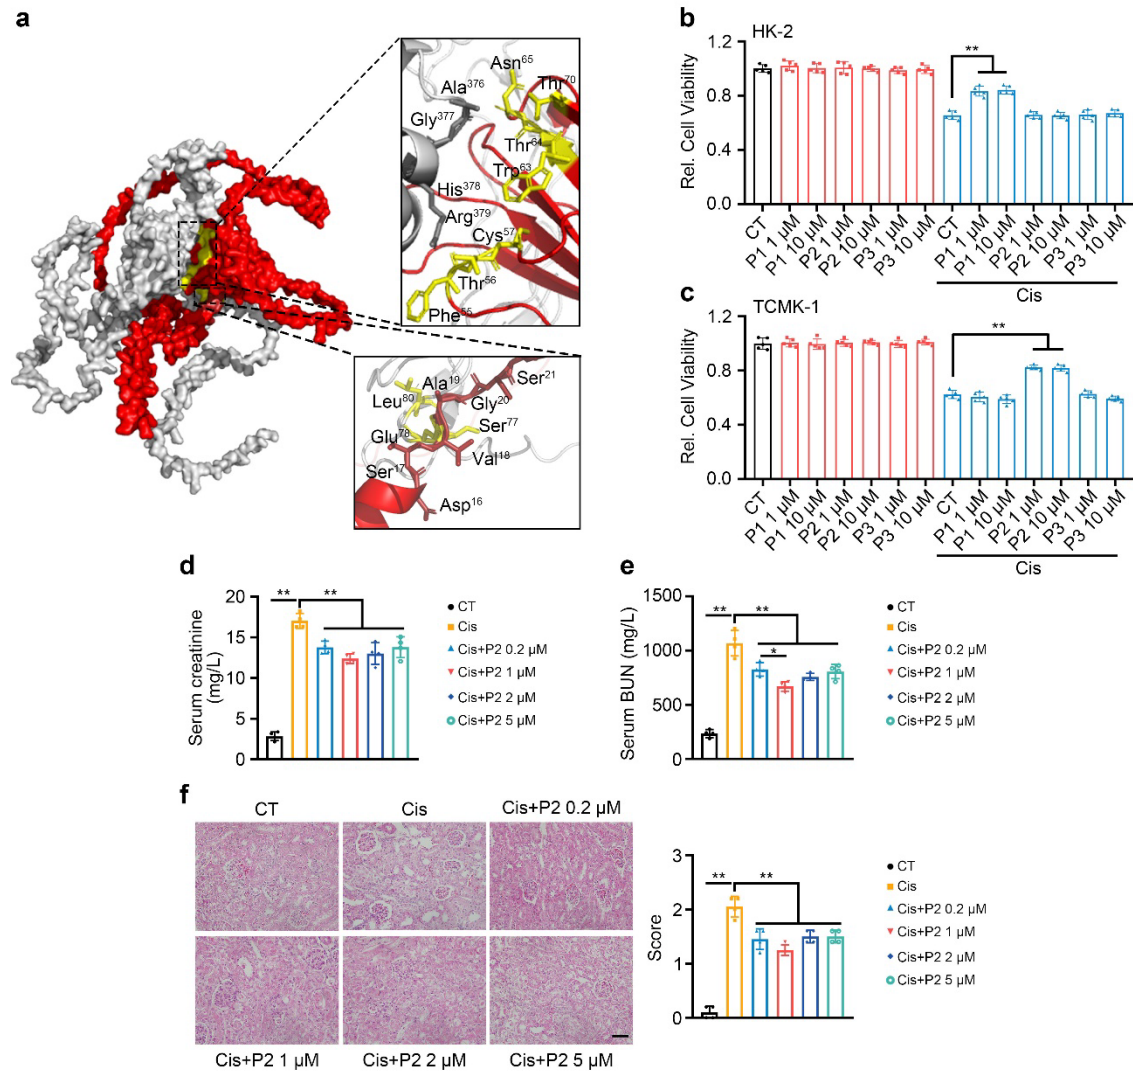

**Supplementary Fig 7. Screening of peptides blocking KIM1-DR5 interaction by**

**AlphaFold2 and their effects against cisplatin injury in cultured renal tubular cells. a**

A simulated low-energy binding conformation of KIM1-DR5 complex. **b-c** Effects of three antagonistic peptides (P1-P3) against 24 hrs cisplatin-injury in human HK-2 (b) and mouse TCMK-1 (c) cells. n = 5 biological samples per group, each experiment was repeated at least three times independently with similar results obtained. **d-e** Serum creatinine (d) and urea nitrogen levels (e) in cisplatin-injured mice treated with different dosages of peptide



P2. n = 4 mice per group. **f** Representative H&E staining and pathological score in cisplatin-injured mice treated with different dosages of peptide P2. Scale bar, 50  $\mu\text{m}$ . n = 4 mice per group. \* $P < 0.05$ ; \*\* $P < 0.01$ . Exact  $P$  values are provided in Source Data file.

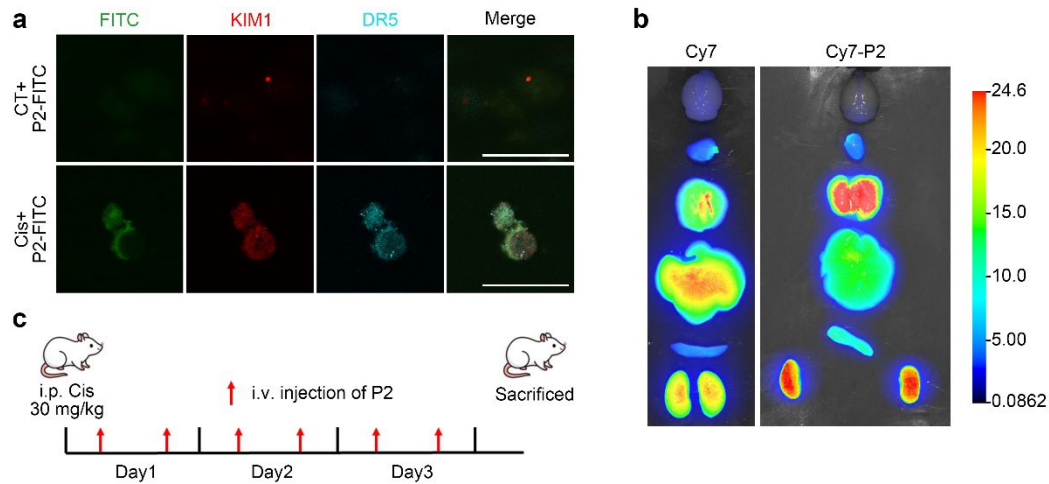

**Supplementary Fig 8. *Ex vivo* distribution of Cy7-labeled peptide P2 in cisplatin-injured AKI mice models and co-staining of P2, KIM1, DR5 in HK-2 cells. a** Representative image of P2-FITC (green), KIM1 (red) and DR5 (cyan) in HK-2 cells with or without 24 hrs cisplatin injury. Scale bar, 50  $\mu$ m. Each experiment was repeated at least three times independently with similar results obtained. **b** *Ex vivo* distribution of Cy7-labeled peptide P2 (Cy7-P2) vs Cy7 *per se* in cisplatin-injured mouse. Top to bottom: brain, heart, lung, liver, spleen and kidney. **c** Schematic diagram of peptide P2 treatment in cisplatin (Cis)-injured mice. i.p., intraperitoneal injection; i.v., intravenous injection.
